# Supplementary material
Source: Springer Nature journal article supplement (https://www.springermedizin.de/resource/supplementary/12887_2005_99_MOESM8_ESM.pdf/9477266)

### Haemoglobin <11 g/dL

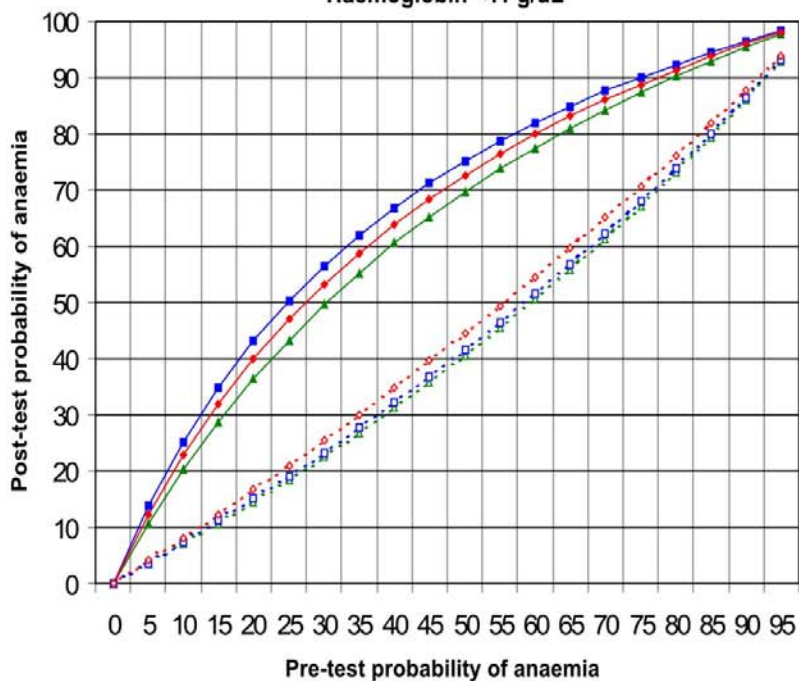

### Haemoglobin <11 g/dL without outlier

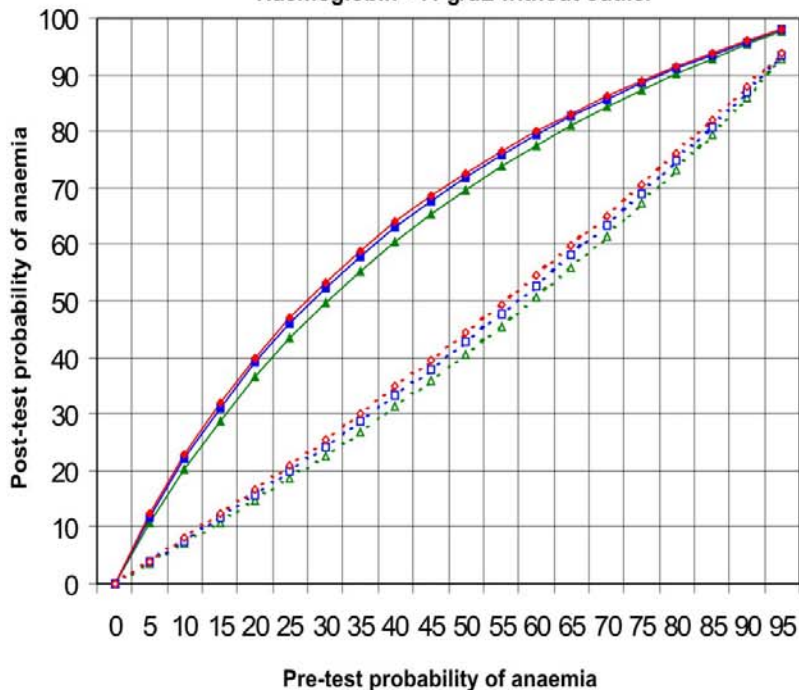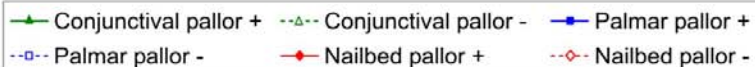

Supplement: MOESM8 [file 9477266]
